# Supplementary material for: Luminescent macroporous aerogels of two-dimensional nanocrystals of metal halide perovskites with adjustable semiconducting bandgaps
Source: Royal Society of Chemistry journal article supplement (doi:10.1039/d4cc03511a), 2024-01-01
Supplement: d4cc03511a1.pdf [file d4cc03511a1.pdf]

ELECTRONIC SUPPLEMENTARY INFORMATION FOR

**Luminescent Macroporous Aerogels of Two-Dimensional Nanocrystals of  
Metal Halide Perovskites with Adjustable Semiconducting Bandgaps**

Penghao Guo,<sup>a</sup> Xuelian Jiang<sup>a</sup> and Pei-Xi Wang<sup>\*a</sup>

<sup>a</sup> i-Lab, Suzhou Institute of Nano-Tech and Nano-Bionics of the Chinese Academy of Sciences, 398 Ruoshui Road,  
Suzhou, Jiangsu 215123, P. R. China

\*Correspondence: pxwang2020@sinano.ac.cn

## EXPERIMENTAL METHODS

### Materials

Lead(II) oxide (99.0 %, Sigma-Aldrich), 2-phenylethylamine (99.0 %, Sigma-Aldrich), hydrobromic acid (48 wt.% in H<sub>2</sub>O, Sigma-Aldrich), hydroiodic acid (57 wt.% in H<sub>2</sub>O, 99.95%, Sigma-Aldrich), manganese(II) bromide (anhydrous, 99%, Thermo Scientific Chemicals), N,N-dimethylformamide (anhydrous, 99.8%, Sigma-Aldrich), cis-1-amino-9-octadecene (oleylamine; 98 %, Aldrich), cis-9-octadecenoic acid (oleic acid; 99 %, Sigma-Aldrich), chlorobenzene (anhydrous, 99.8 %, Sigma-Aldrich), and cyclohexane (anhydrous, 99.5 %, Sigma-Aldrich) were used as received.

### Characterizations

Atomic force microscopy was conducted on a Bruker Dimension Icon Atomic Force Microscope with ScanAsyst. Field emission scanning electron spectroscopy were performed on a Hitachi Regulus 8230 Ultra-high Resolution Scanning Electron Microscope. Powder X-ray diffraction patterns were collected on a Bruker D8 ADVANCE Diffractometer using copper K-alpha radiation (with a wavelength of 0.15406 nm). Photoluminescence excitation and emission spectroscopy were performed on a Hitachi F-4600 Fluorescence Spectrophotometer.

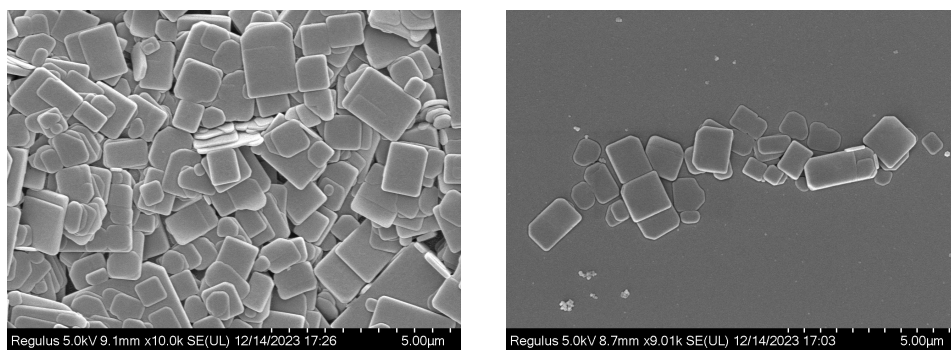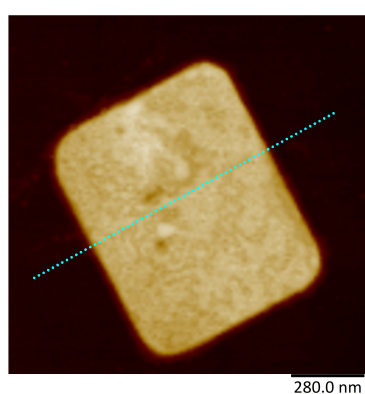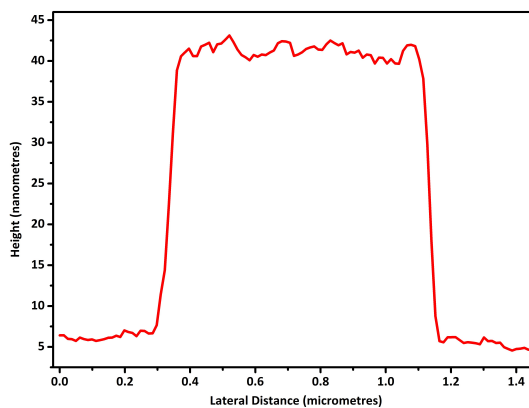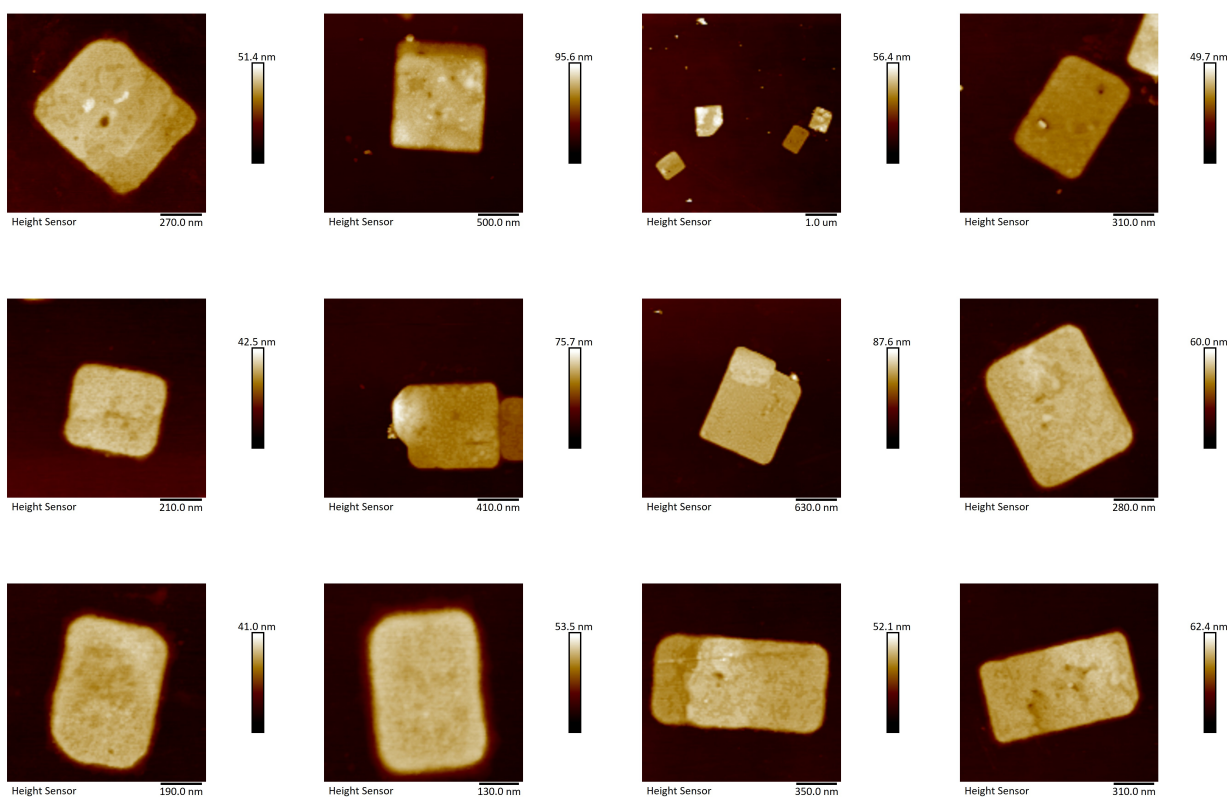

**Figure S1.** Additional scanning electron microscopy and atomic force microscopy images (with original resolutions of 1320 x 1080 pixels) showing lateral dimensions and thicknesses of  $(\text{C}_6\text{H}_5\text{-CH}_2\text{-CH}_2\text{-NH}_3)_2\text{PbBr}_4$  nanoplatelets.

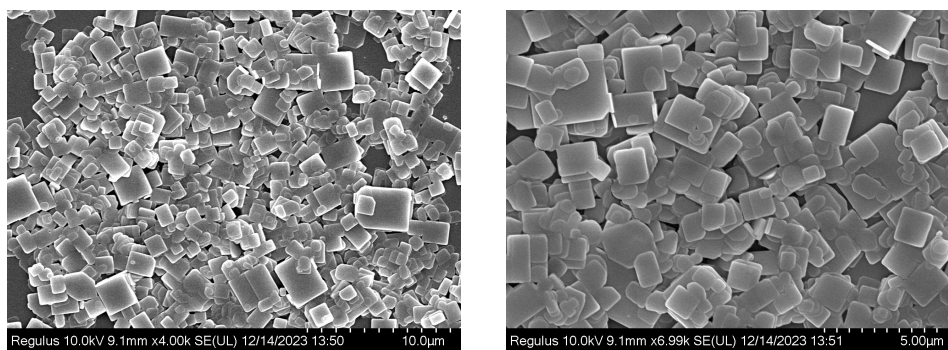

**Figure S2.** Scanning electron microscopy images showing  $(\text{C}_6\text{H}_5\text{-CH}_2\text{-CH}_2\text{-NH}_3)_2\text{Pb}_{0.977}\text{Mn}_{0.023}\text{Br}_4$  nanoplatelets.

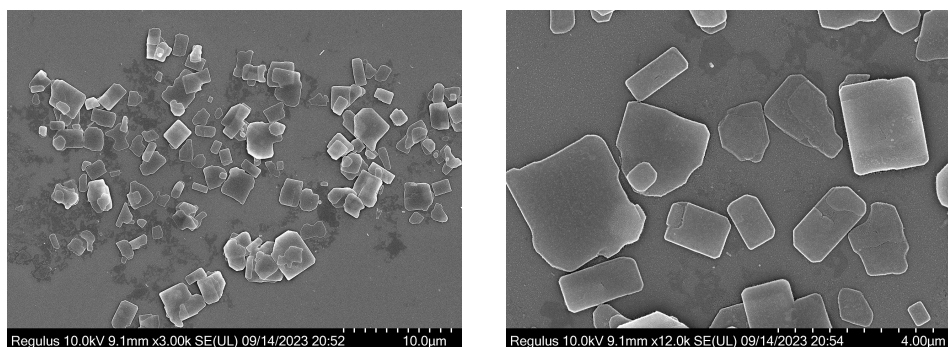

**Figure S3.** Scanning electron microscopy images showing the geometry of  $(\text{C}_6\text{H}_5\text{-CH}_2\text{-CH}_2\text{-NH}_3)_2\text{PbBr}_3\text{I}_1$  nanoplatelets.

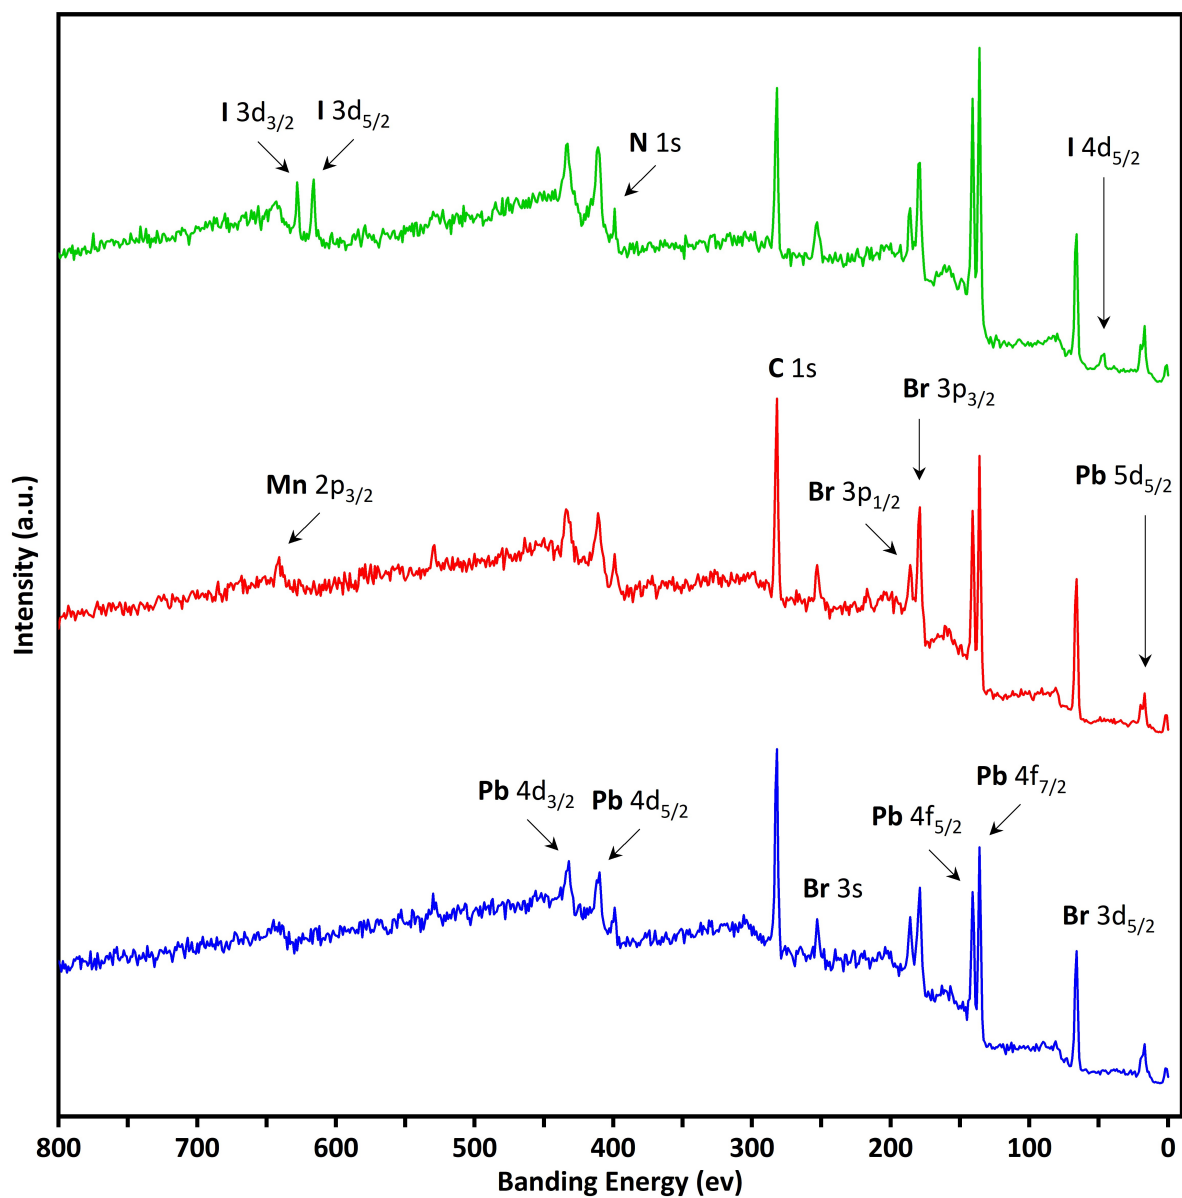

**Figure S4.** X-ray photoelectron spectroscopy signals of colloidal aerogels of  $(\text{C}_6\text{H}_5\text{-CH}_2\text{-CH}_2\text{-NH}_3)_2\text{PbBr}_3\text{I}_1$  (upper curve, depicted in green),  $(\text{C}_6\text{H}_5\text{-CH}_2\text{-CH}_2\text{-NH}_3)_2\text{Pb}_{0.977}\text{Mn}_{0.023}\text{Br}_4$  (middle curve, depicted in red), and  $(\text{C}_6\text{H}_5\text{-CH}_2\text{-CH}_2\text{-NH}_3)_2\text{PbBr}_4$  (lower curve, blue-colored) perovskite nanoplatelets.

$(\text{C}_6\text{H}_5\text{-CH}_2\text{-CH}_2\text{-NH}_3)_2\text{Pb}_{0.977}\text{Mn}_{0.023}\text{Br}_4$   
BET specific surface area:  $4.46 \text{ m}^2/\text{g}$   
BJH adsorption average pore width:  $18.5 \text{ nm}$

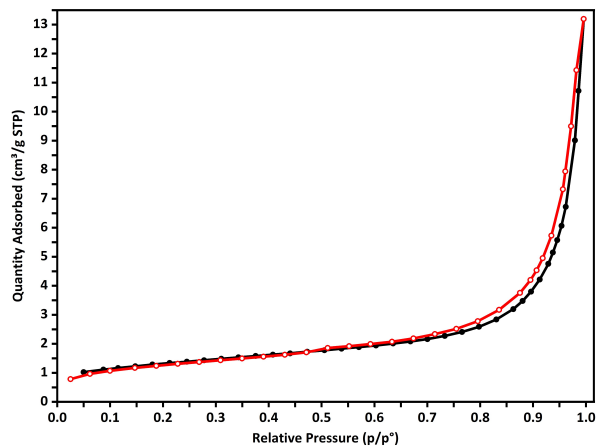

$(\text{C}_6\text{H}_5\text{-CH}_2\text{-CH}_2\text{-NH}_3)_2\text{PbBr}_3\text{I}_1$   
BET specific surface area:  $1.87 \text{ m}^2/\text{g}$   
BJH adsorption average pore width:  $9.0 \text{ nm}$

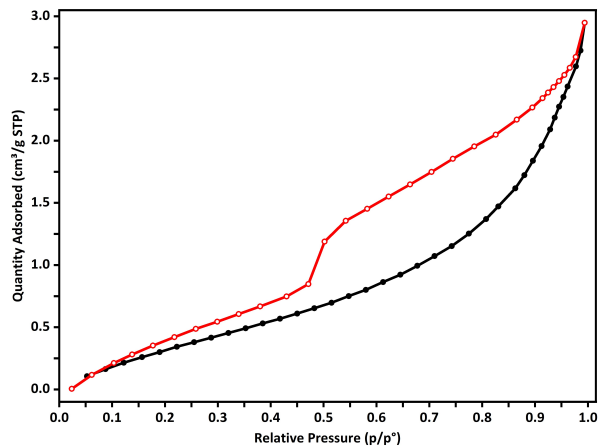

**Figure S5.** Nitrogen adsorption-desorption isotherms of colloidal aerogels of  $(\text{C}_6\text{H}_5\text{-CH}_2\text{-CH}_2\text{-NH}_3)_2\text{Pb}_{0.977}\text{Mn}_{0.023}\text{Br}_4$  and  $(\text{C}_6\text{H}_5\text{-CH}_2\text{-CH}_2\text{-NH}_3)_2\text{PbBr}_3\text{I}_1$  perovskite nanoplatelets.

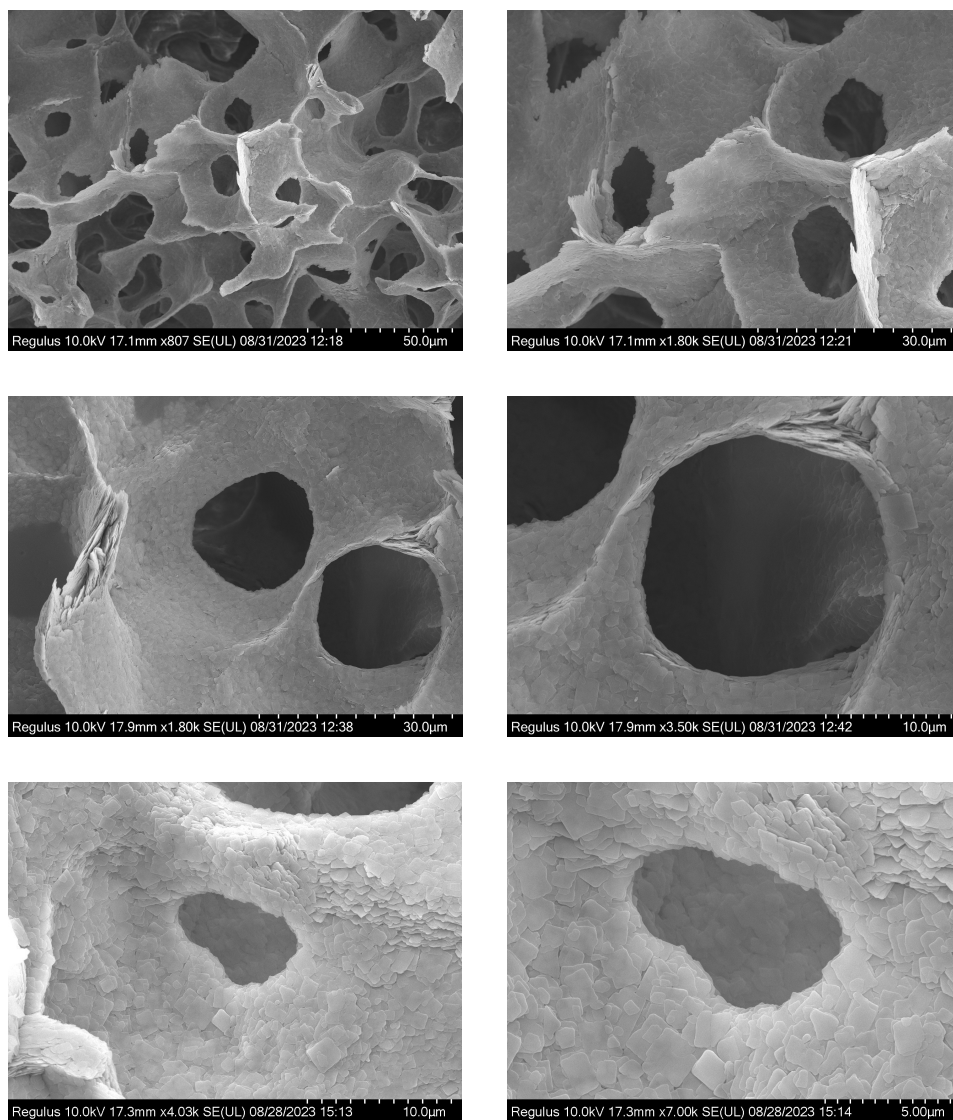

**Figure S6.** Cross-sectional scanning electron microscopy images of  $(\text{C}_6\text{H}_5\text{-CH}_2\text{-CH}_2\text{-NH}_3)_2\text{PbBr}_4$  aerogels.

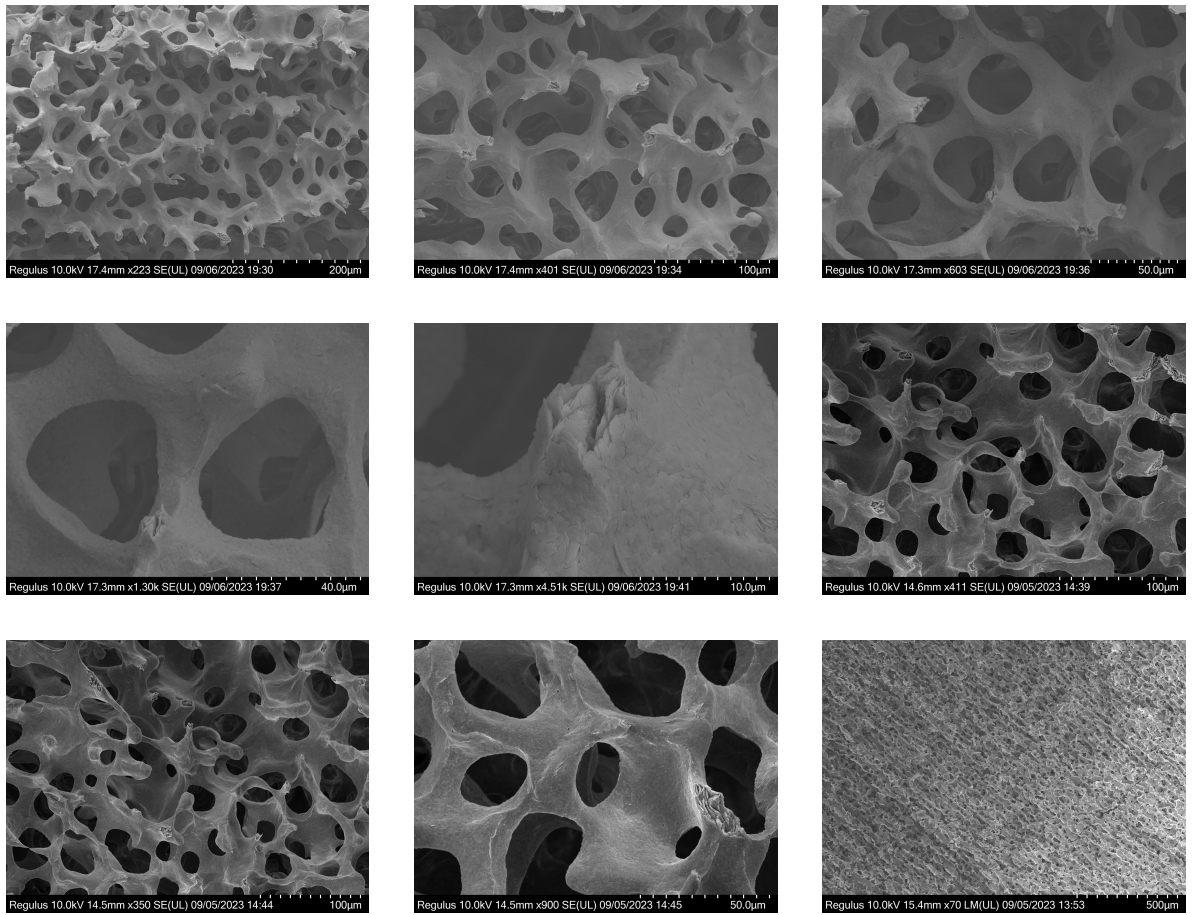

**Figure S7.** Cross-sectional scanning electron microscopy images of  $(\text{C}_6\text{H}_5\text{-CH}_2\text{-CH}_2\text{-NH}_3)_2\text{Pb}_{0.977}\text{Mn}_{0.023}\text{Br}_4$  aerogels.



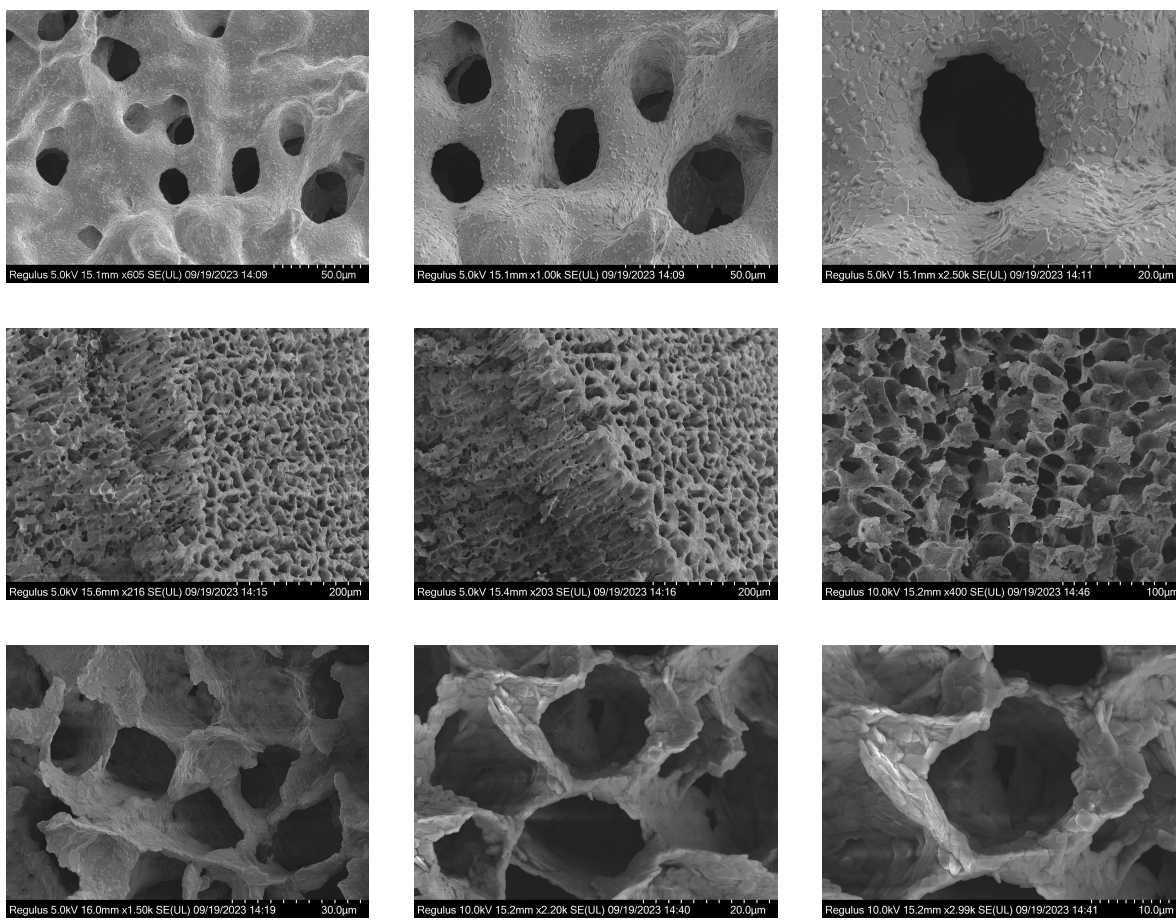

**Figure S8.** Cross-sectional scanning electron microscopy images of  $(\text{C}_6\text{H}_5\text{-CH}_2\text{-CH}_2\text{-NH}_3)_2\text{PbBr}_3$  aerogels.

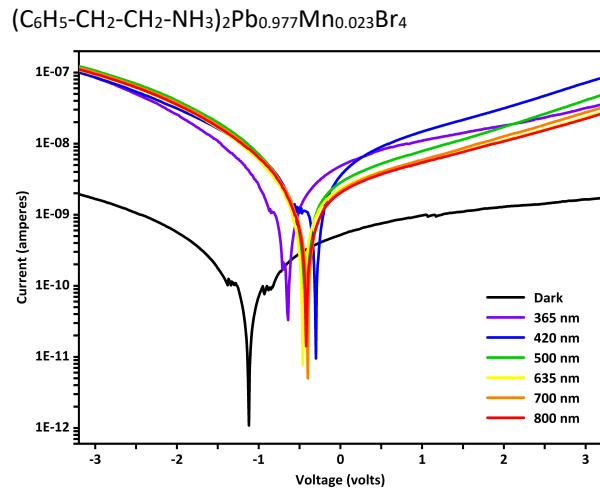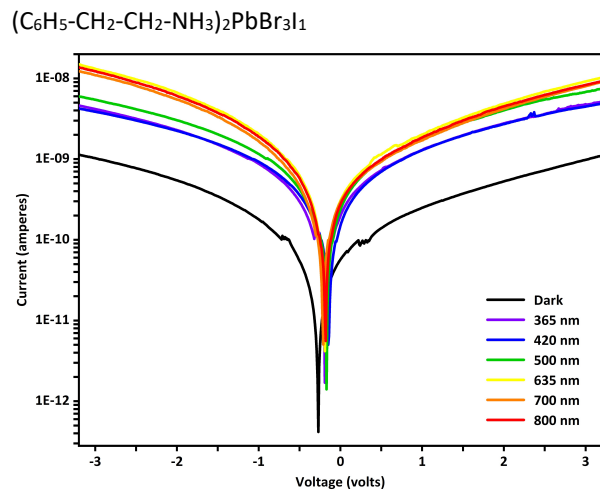

**Figure S9.** Current-voltage characteristics of  $(\text{C}_6\text{H}_5\text{-CH}_2\text{-CH}_2\text{-NH}_3)_2\text{Pb}_{0.977}\text{Mn}_{0.023}\text{Br}_4$  and  $(\text{C}_6\text{H}_5\text{-CH}_2\text{-CH}_2\text{-NH}_3)_2\text{PbBr}_3\text{I}_1$  perovskite aerogels under  $0.18 \text{ mW}/\text{mm}^2$  illumination.
